# Supplementary material for: The rhizobial effector NopT targets Nod factor receptors to regulate symbiosis in Lotus japonicus
Source: eLife journal article supplement (doi:10.7554/elife.97196), 2024-06-13
Supplement: fig4-data1 [file elife-97196-fig4-data1-v1.zip]

## Sheet: Sheet1
actin	area
1	31840.1	211359	31174.1
2	35034	224314	29871.4
3	38818.8	218762	30440.2
4	41240.8	212568	31427.8
c93s
1	18458	633266	743607		0.579708	2.99616	23.8534		1	1	1
2	20729.4	679145	867321		0.591693	3.02765	29.0351		1.02067	1.01051	1.21723
3	20771.8	774234	769492		0.535096	3.53916	25.2788		0.923043	1.18123	1.05976
4	35249.6	812894	837775		0.854728	3.82416	26.6571		1.47441	1.27635	1.11754
P c93s
1	436290	797906	322088		13.7025	3.77512	10.3319		1	1	1
2	532914	818567	338664		15.2113	3.6492	11.3374		1.11011	0.966645	1.09732
3	409739	869920	474412		10.5552	3.97656	15.585		0.770309	1.05336	1.50843
4	1505319	1750325	777656		36.5007	8.23419	24.7442		2.6638	2.18117	2.39493
