# Supplementary material for: The rhizobial effector NopT targets Nod factor receptors to regulate symbiosis in Lotus japonicus
Source: eLife journal article supplement (doi:10.7554/elife.97196), 2024-06-13

Figure 4-figure supplement 1

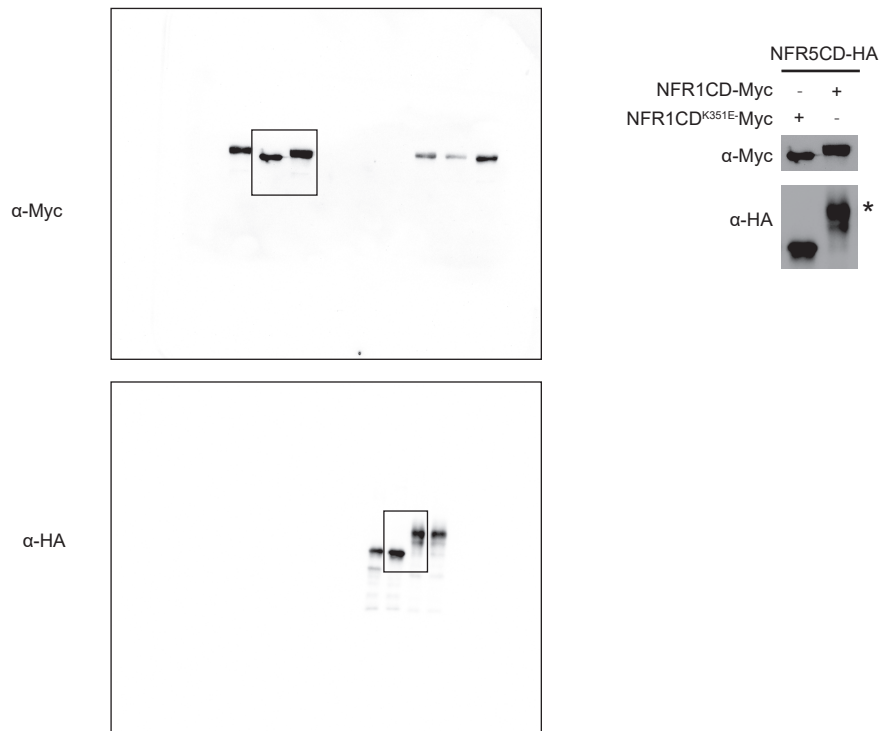

Supplement: fig4-figsupp1-data2 [file elife-97196-fig4-figsupp1-data2-v1.pdf]
