# Supplementary material for: The rhizobial effector NopT targets Nod factor receptors to regulate symbiosis in Lotus japonicus
Source: eLife. 2025 Apr 4;13:RP97196. doi: 10.7554/eLife.97196 (PMC11970910; doi:10.7554/eLife.97196)
Supplement: Supplementary file 1. — (A) Phosphopeptides identified by liquid chromatography–mass spectrometry. (B) Oligonucleotides used in the study. [file elife-97196-supp1.docx]

**Supplementary Files**

**Supplemental File 1a.** **Phosphopeptides identified by liquid chromatography–mass spectrometry.** An *in vitro* kinase assay was performed using the CD of NFR1 and NopT. NopT was separated by SDS-PAGE, and the digested gel slices representing the phosphorylated NopT were used for analysis. The deduced phosphopeptides are listed.


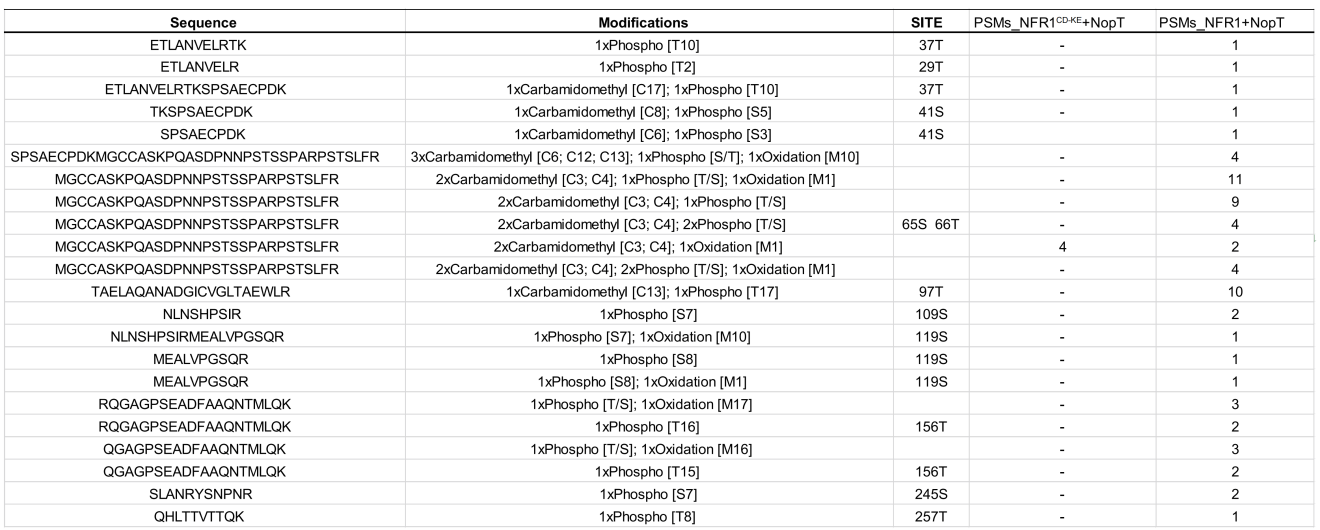


**Supplemental File 1b. Primers used in this study.**

| **Used for** | **Target genes** | **Names** | **Sequences (from 5’ to 3’)** |
| --- | --- | --- | --- |
| Overexpression in Nicotiana benthamiana | NopT or NopTC93S | p5X-NopT-F | agaacacgggggactctagaatgcacagtcccatcag |
| p5X-NopT-R | ccgctgttatcggtacctgtcatcttttgggtggtcac |
| NopTΔN50 | p5X-NopTdeN50-F | agaacacgggggactctagaatgtgctgcgccagcaag |
| NFR1 | p5X-NFR1-F | agaacacgggggactctagaatgaagctaaaaactggtctact |
| p5X-NFR1-R | ccgctgttatcggtacctcttctcacagac |
| NFR5 | p5X-NFR5-F | agaacacgggggactctagaatggctgtcttctttcttacc |
| p5X-NFR5-R | ccgctgttatcggtaccacgtgcagtaat |
| p5X-NFR5gfp-R | tcccgggagcggtaccacgtgcagtaatggaagt |
| AvrPphB | p5X-AvrPphB-F | agaacacgggggactctagaatgaaaataggtacgcaggcc |
| p5X-AvrPphB-R | ccgctgttatcggtacccgaaactctaaactcgtttacgc |
| templates for protein expression | NopTUSDA257 | p5X-257T-F | agaacacgggggactctagatgctgcgtgatccgaacaat |
| p5X-257T-R | ccgctgttatcggtacctgtcaccttttgggtggtcaccg |
| NopT1USDA110 | p5X-110T1-F | agaacacgggggactctagaatgtatgatcgaatcggtgg |
| p5X-110T1-R | ccgctgttatcggtaccctgcatcctttgcgtcg |
| NopT2USDA110 | p5X-110T2-F | agaacacgggggactctagaatgtataatcgagtcgatggc |
| p5X-110T2-R | ccgctgttatcggtaccccgatgaggttccgc |
| Protein Expression in *E.coli* | NopT or NopTC93S | 28a NopT-F | tgggtcgcggatccgaattcatgcacagtcccatcag |
| 28a FLAG-R | tcgagtgcggccgcaagcttcttgtcatcgtcatccttgtag |
| 28a Strep-R | tcgagtgcggccgcaagctttttttcaaattgaggatgagaccatcc |
| AvrPphB | ET28a-pphb-F | tgggtcgcggatccgaattcaaaataggtacgcaggccac |
| NopTUSDA257 | ET28a-257T-F | tgggtcgcggatccgaattcctgcgtgatccgaacaa |
| NopT1USDA110 | ET28a-110T1-F | tgggtcgcggatccgaattctatgatcgaatcggtggctc |
| NopT2USDA110 | ET28a-110T2-F | tgggtcgcggatccgaattctataatcgagtcgatggcgaatac |
| NFR1CD | duet NFR1-F | accacagccaggatccgagataccagaagaaggaagaagagaaagc |
| duet Sac1nost-R | ggcgcgccgagctcgcgatcggggaaattcgagct |
| NFR5CD | ACSH-NFR5-F | agaagcgcggatccgaattctatgtatactgccgcagaaagaag |
| ACSH-NFR5-R | cgtatgggtagcttccaagcttacgtgcagtaatggaagtc |
| NFR5KD | SUMO 5KD-F | ccgcgaacagattggtaaggttggggaatcagtgtac |
| SUMO HA-R | gctcgaattcggatcctttcacgcatagtcaggaacatcg |
| NFR5JM | SUMO 5JM-F | ccgcgaacagattggttatgtatactgccgcagaaagaag |
| SUMO 5JM-R | gctcgaattcggatcctttcacgcatagtcaggaacatcg |
| sumo-NFR5KD-HA | duet sumo-F | catcaccacagccaggatgggtccctgcaggac |
| duet HA-R | cattatgcggccgcaagcttttacgcatagtcaggaacatcg |
| sumo-NFR5JM-GFP | duet sumo-F | catcaccacagccaggatgggtccctgcaggac |
| duet GFP-R | atgcggccgcaagcttttacttgtacaactcatccatacc |
| AtLYK5 | ACSH-LYK5-F | gcgcggatccgaattctacaaacgaaggtctaagaag |
| ACSH-LYK5-R | ggtagcttccaagcttgttgccaagagagccg |
| LjLYS11 | ACSH-LYS11-F | agaagcgcggatccgaattcacttgtctgaggaagagaaag |
| ACSH-LYS11-R | cgtatgggtagcttccaagcttacgagctgctatcaaagtt |
| LYK5JM NFR5KD | LYK5-NFR5-F | cgaaaacagaaaggttggggaatcagtg |
| NFR5 LYK5-R | ccccaacctttctgttttcgtcgctgaaatt |
| LYS11JM NFR5KD | LYS11 NFR5-F | gagcagtgtaaggttggggaatcag |
| NFR5 LYS11R | ccccaaccttacactgctcattgagg |
|  | NFPJM | ACSUG NFPJ-F | gtggaggcgctagaggatcctattgtctcaaaatgaagagattgaatagaag |
|  | ACSUG NFPJ-R | cttctcccttagagagctcacaattgtcactcagattcattg |
|  | NFR5JM-NFPKD | 5JM-PKD-F | gatgagtgcaagattggtgaatcagtttacaaag |
|  | 5JM-PKD-R | accaatcttgcactcatcgct |
|  | NFPJM-NFR5KD | PJM-5KD-F | gacaattgtaaggttggggaatcagtg |
|  | PJM-5KD-R | ccccaaccttacaattgtcactcagattcattg |
|  | NFR5268-445-NFP458-595 | 51/2KD-P1/2KD-F | ccatggccagaacttcaaccaactcaat |
|  | 51/2KD-P1/2KD-R | gaagttctggccatggcgaa |
|  | NFP270-457-NFR5456-595 | P1/2KD-51/2KD-F | ggatggctagaacttcgaccaac |
|  | P1/2KD-51/2KD-R | cgaagttctagccatcccgaa |
| site mutantions construction | NopT | T93S-F | gaatctccgtcggcttgactgc |
| T93S-F | gacggagattccatctgcgttc |
| 97D-F | ggcttggatgcggagtggctgcg |
| 97D-R | ctccgcatccaagccgacgcag |
| 97A-F | ggcttggctgcggagtggctgc |
| 97A-R | ctccgcagccaagccgacg |
| 109D-F | catccggatatccgaatggaggccctag |
| 109D-R | ttcggatatccggatgactgttgaggttacgc |
| 109A-F | catccggcaatccgaatggag |
| 109A-R | ttcggattgccggatgactgttg |
| 119D-R | cccggagatcaaaggcacgcctcagc |
| 119A-F | gcctttgatctccgggtactagggcc |
| 119A-F | cccggagcgcaaaggcac |
| 119A-R | ctttgcgctccgggtactagg |
| 156D-F | gcaaaacgatatgttgcagaaagcaggc |
| 156D-R | gcaacatatcgttttgcgccgcgaagtcggcc |
| 156A-F | gcaaaacgctatgttgcagaaagcag |
| 156A-R | ctgcaacatagcgttttgcgccgcgaagtc |
| H205A-F | ggcggcaacaccgttgcgacc |
| H205A-R | caacggtgttgccgccgccctcagc |
| D220A-F | ctcttcgctcctaatttcggcgaatttac |
| D220A-R | gccgaaattaggagcgaagagcgtggtgtttc |
| 245D-F | cgctacgacaatccaaaccggcag |
| 245D-R | ttggattgtcgtagcgattggctaggct |
| 257 mutants | changing the sequence of r primer at noptt257when cloned into vectors |
| NFR1 | K351E-F | gcaattgagaagatggatgtacaagcatc |
| K351E-R | catccatcttctcaattgctgttttcttgcc |
| NFR5 | 269-271A-F | ctatgcagctgcacgcagaaagaaggctctg |
| 269-271A-R | gcgtgcagctgcatagaattcggatccgcgc |
| 272-274A-F | ctgcgctgcagctaaggctctgaataggactgc |
| 272-274A-R | cttagctgcagcgcagtatacatagaattcggatcc |
| 275-277A-F | gaaaggcagctgcaaataggactgcttcatcagc |
| 275-277A-R | ctatttgcagctgcctttctgcggcagtatacatag |
| 278-280A-F | ctggctgcagctgcttcatcagctgagactg |
| 278-280A-R | agcagctgcagccagagccttctttctgcg |
| 282-283A-F | gcagcagctgagactgctgataaactac |
| 282-283A-R | gcagtctcagctgctgcagcagtcctattcagag |
| 285-286A-F | ggggctgctgataaactactttctggag |
| 285-286A-R | agtagtttatcagcagccccagctgatgaagcagtc |
| 288-290A-F | gctgcagcactttctggagtttcaggctatgtaag |
| 288-290A-R | aaactccagaaagtgctgcagcagcagtctcagctgatgaag |
| 291-294A-F | gagactgctgataaactagctgctgcagtttcaggctatgtaagcaagcc |
| 291-294A-R | atagcctgaaactgcagcagctagtttatcagcagtctcagctg |
| 295-298A-F | gagttgcagctgctgtaagcaagccaaacgtgtatg |
| 295-298A-R | cttacagcagctgcaactccagaaagtagtttatcagcag |
| 298-300A-F | ctatgcagctgcaccaaacgtgtatgaaatcgacg |
| 298-300A-R | gtttggtgcagctgcatagcctgaaactccagaaagtag |
| 301-303A-F | gcaaggcagctgcttatgaaatcgacgagataatggaagc |
| 301-303A-R | cataagcagctgccttgcttacatagcctgaaactcc |
| 304-306A-F | gtggctgcagctgacgagataatggaagctacgaag |
| 304-306A-R | cgtcagctgcagccacgtttggcttgcttacatagc |
| 307-309A-F | gaaatcgctgcagcaatggaagctacgaaggatttcag |
| 307-309A-R | ccattgctgcagcgatttcatacacgtttggcttgc |
| 310-312A-F | cgagatagcagctgctacgaaggatttcagcg |
| 310-312A-R | gtagcagctgctatctcgtcgatttcatacacgtttg |
| 313-315A-F | gctgcagctgcattcagcgatgagtgcaagg |
| 313-315A-R | ctgaatgcagctgcagcttccattatctcgtcgatttc |
| 316-318A-F | ggatgcagctgctgagtgcaaggttggggaatc |
| 316-318A-R | ctcagcagctgcatccttcgtagcttccattatctc |
| 319-321A-F | cgatgctgcagctgttggggaatcagtgtacaagg |
| 319-321A-R | caacagctgcagcatcgctgaaatccttcgtagc |
| 322-324A-F | gcaaggcagctgcatcagtgtacaaggccaacatag |
| 322-324A-R | gatgcagctgccttgcactcatcgctgaaatc |
| 325-327A-F | gaagcagctgcaaaggccaacatagaaggtcg |
| 325-327A-R | gcctttgcagctgcttccccaaccttgcactc |
| 268-277DE-F | agaagcgcggatccgaattcaataggactgct |
| 268-277DE-R | ctgatgaagcagtcctattgaattcggatccgcgcttc |
| 278-287DE-F | gcagaaagaaggctctggataaactactttctggagtttcagg |
| 278-287DE-R | aaactccagaaagtagtttatccagagccttctttctgcg |
| 298-307DE-F | caggctatgagataatggaagctacgaaggatttc |
| 298-307DE-R | cttccattatctcatagcctgaaactccagaaagtag |
| 308-317DE-F | gaaatcgacgatgagtgcaaggttgggg |
| 308-317DE-R | ttgcactcatcgtcgatttcatacacgtttggc |
| 318-327DE-F | gatttcagcaaggccaacatagaaggtcg |
| 318-327DE-R | gttggccttgctgaaatccttcgtagcttcc |
| 328-337DE-F | tcagtgtacgtaaagaaaatcaaggaaggtggtgcc |
| 328-337DE-R | attttctttacgtacactgattccccaaccttg |
| 288-294A-F | gcagctgccgcagcggctgcctcaggctatgtaagcaagcc |
| 288-294A-R | gcagccgctgcggcagctgcagcagtctcagctgatgaagc |
| 288-298PBS1-F | ggagacaaatctcatgtctcctcaggctatgtaagcaagcc |
| 288-298PBS1-R | ggagacatgagatttgtctccagcagtctcagctgatgaagc |
| N5-283S-R | tgaagcagtcctattcagagcc |
| 283Y-F | tctgaataggactgcttcatacgctgagactgc |
| N5-294G | agaaagtagtttatcagcagtctcag |
| 294Q-F | ctgctgataaactactttctcaggtttcaggctatgtaag |
| N5-303Y-R | cacgtttggcttgcttacatag |
| 304S-F | gcaagccaaacgtgtccgaaatcgacgag |
| N5-310AT-R | ttccattatctcgtcgatttcatacac |
| 311-2 IY-F | gaaatcgacgagataatggaaatctacaaggatttcagcgatgagtg |
| Complemental | NopT | HC-proT-F | gaattcgagctcggtacctcatggccttccttggagg |
| T-3-F | cacagtcccatcagtggttc |
| T-3-R | gaaccactgatgggactgtg |
| HC-T-R | cgcgggatcgagatctcgagtcatgtcatcttttgggtggtc |
| NFR5 | cherry-proNFR5-F | ccaagctgggctgcagggacatgagattgaagctcc |
| proNFR5-NFR5-F | ccccacttcacaaacatggctgtcttctttcttacctc |
| proNFR5-NFR5-R | gccatgtttgtgaagtgggg |
| NFR5-JM-KD-F | gatgagtgcaaggttgggg |
| NFR5-JM-KD-R | ccccaaccttgcactcatc |
| cherry kpn1 Sac1-R | ggcgcgcctaggtaccggggaaattcgagc |
