# Supplementary figures and images for: The rhizobial effector NopT targets Nod factor receptors to regulate symbiosis in Lotus japonicus
Source: eLife journal article supplement (doi:10.7554/elife.97196), 2024-06-13

Fig. 3A

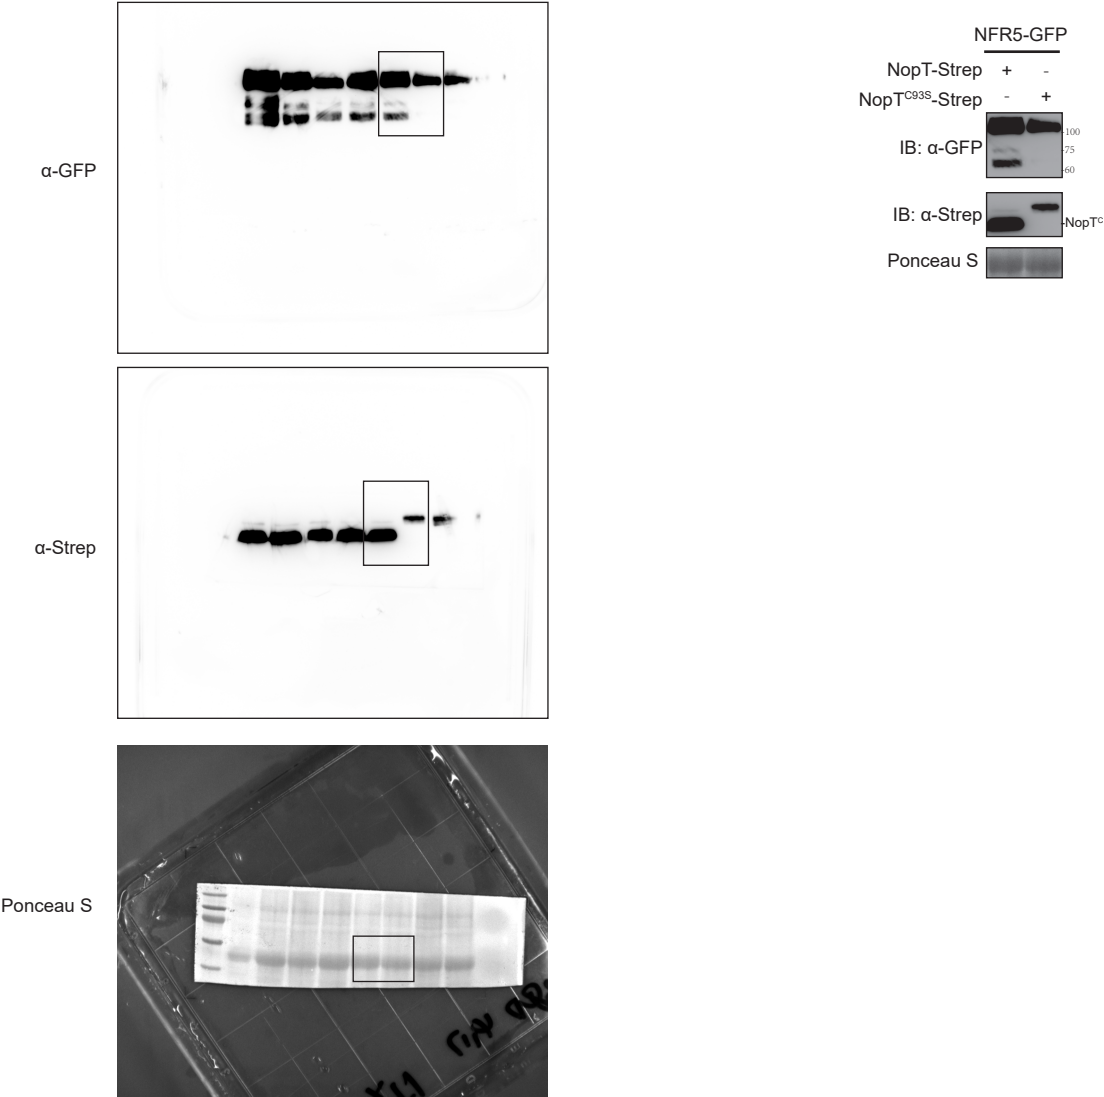

Supplement: fig3-data2 [file elife-97196-fig3-data2-v1.zip]

Fig. 3G

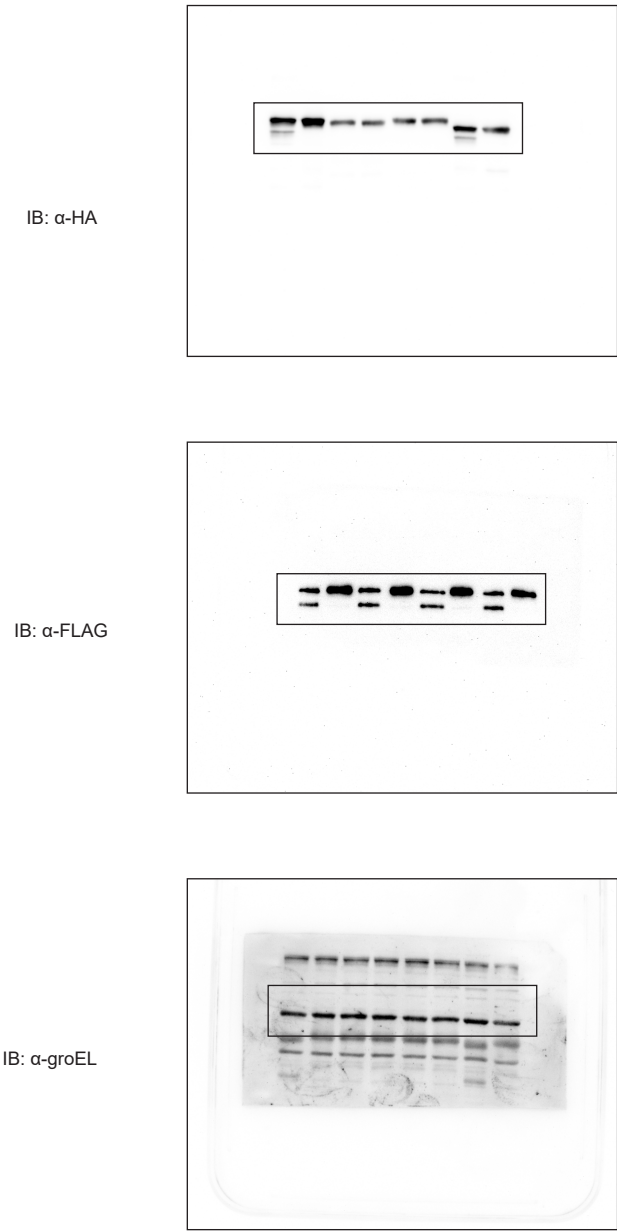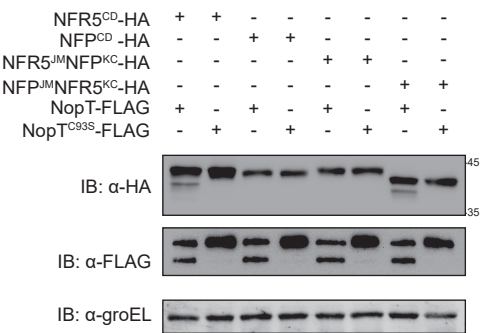

Supplement: fig3-data2 [file elife-97196-fig3-data2-v1.zip]

Fig. 3B

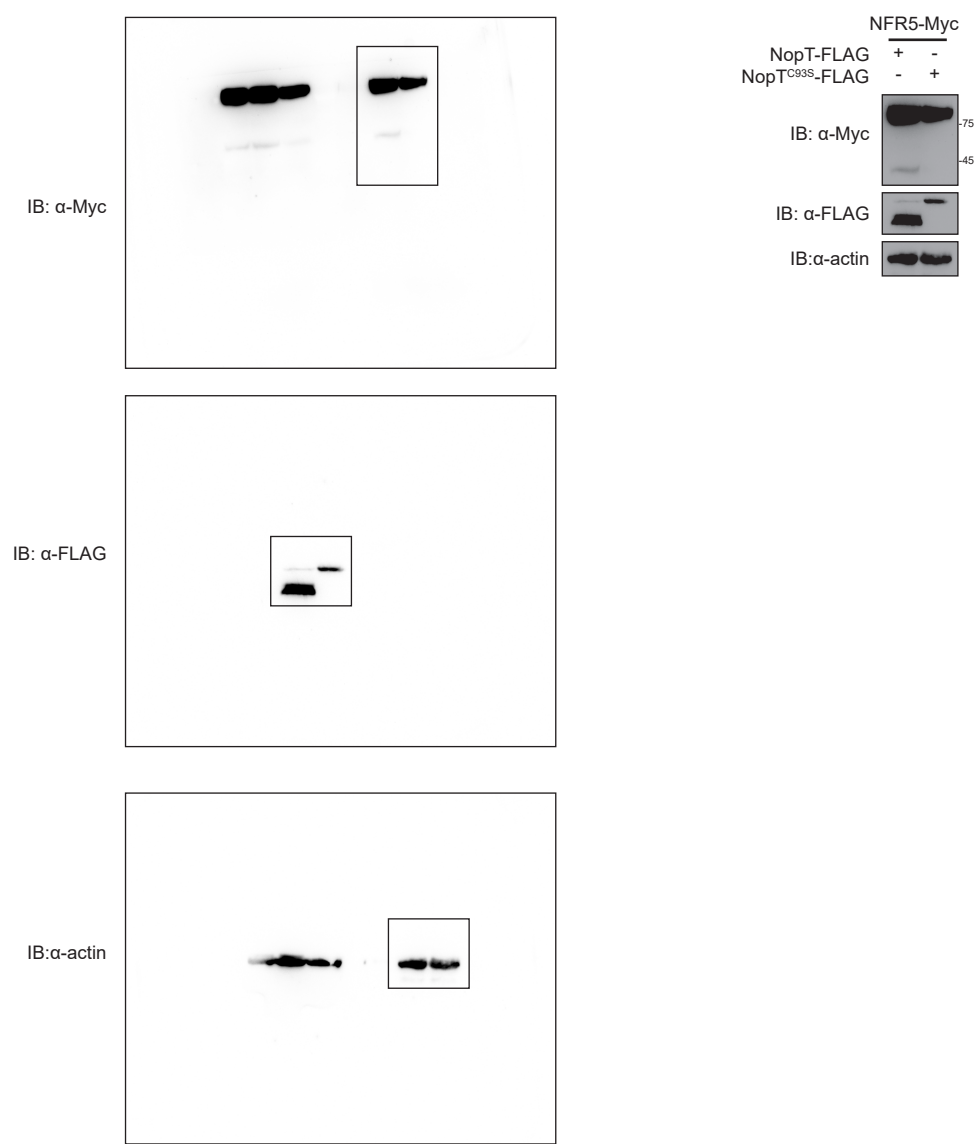

Supplement: fig3-data2 [file elife-97196-fig3-data2-v1.zip]

Fig. 3F

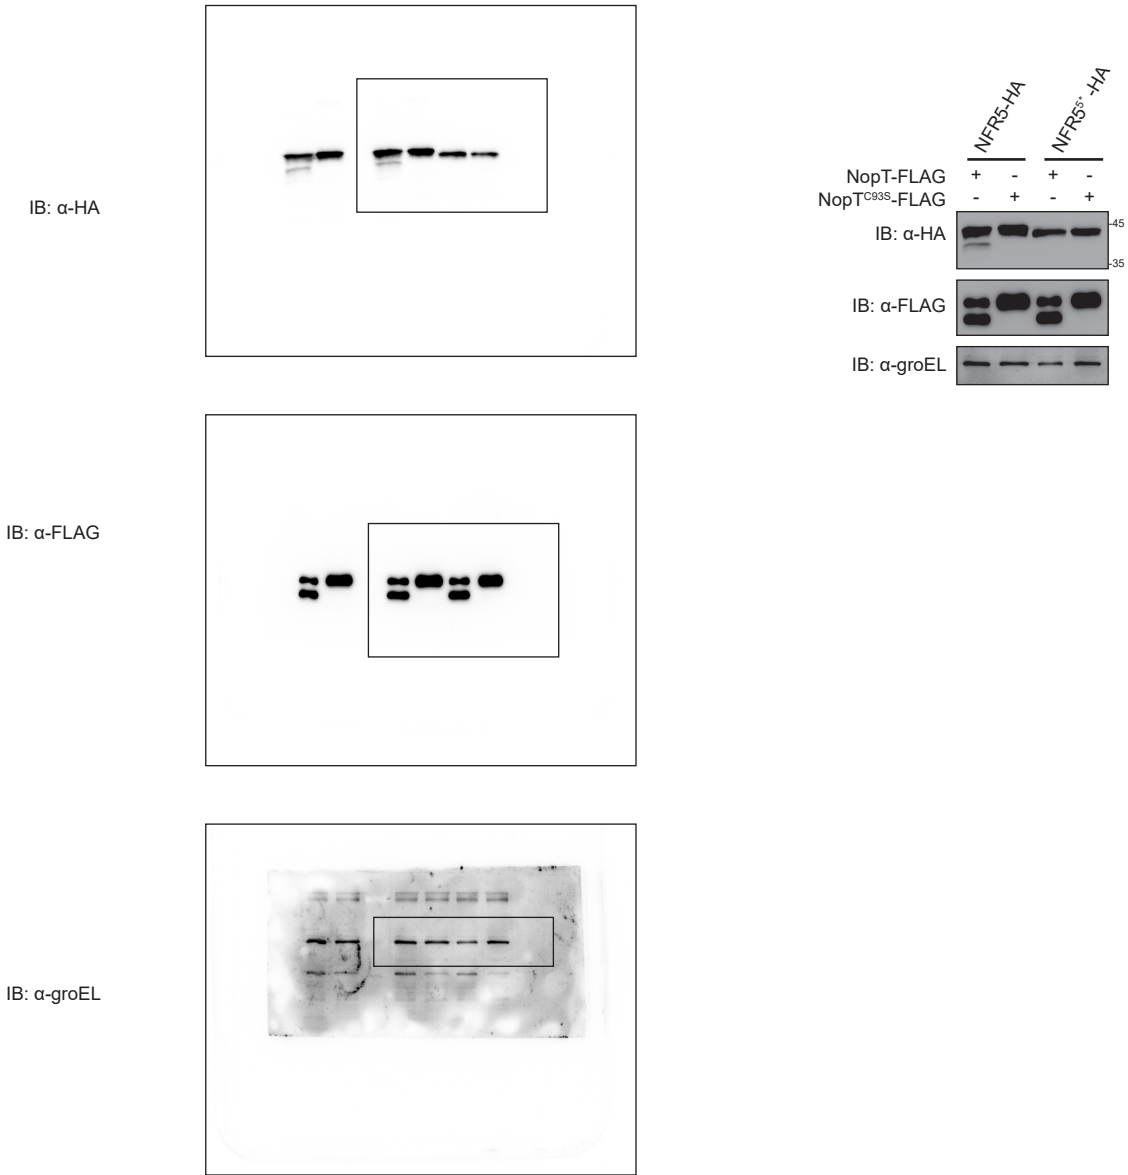

Supplement: fig3-data2 [file elife-97196-fig3-data2-v1.zip]

Fig. 3C

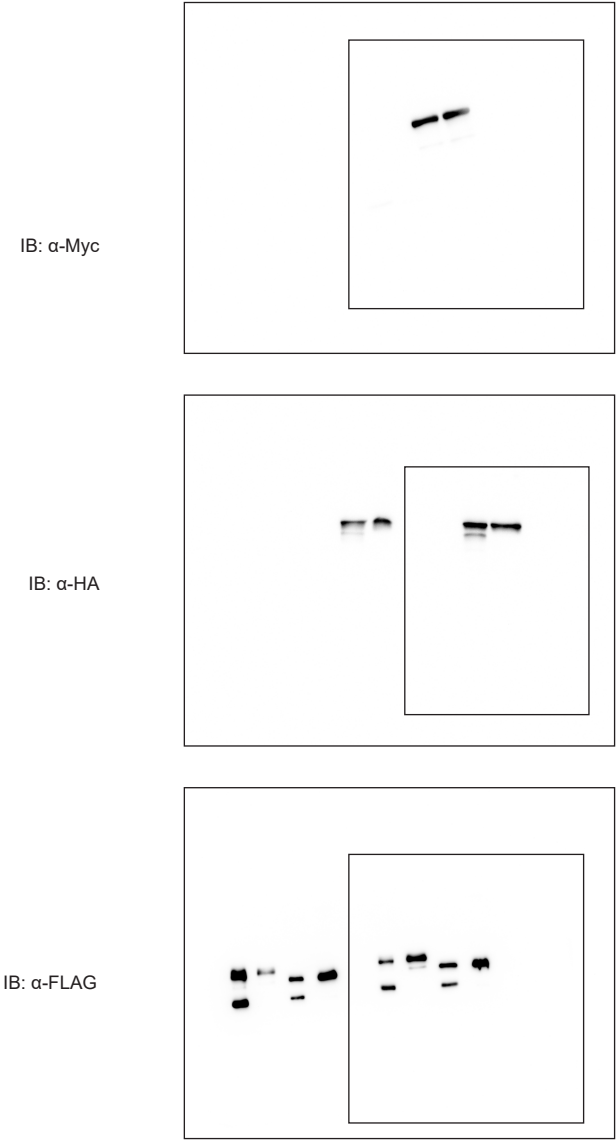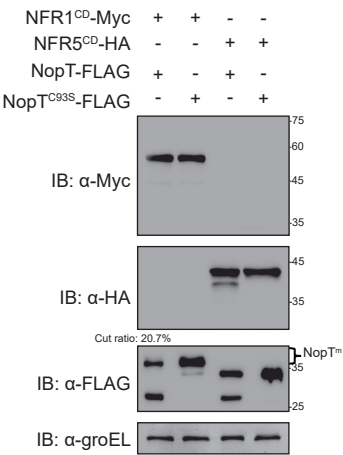

Supplement: fig3-data2 [file elife-97196-fig3-data2-v1.zip]

Fig. 3E

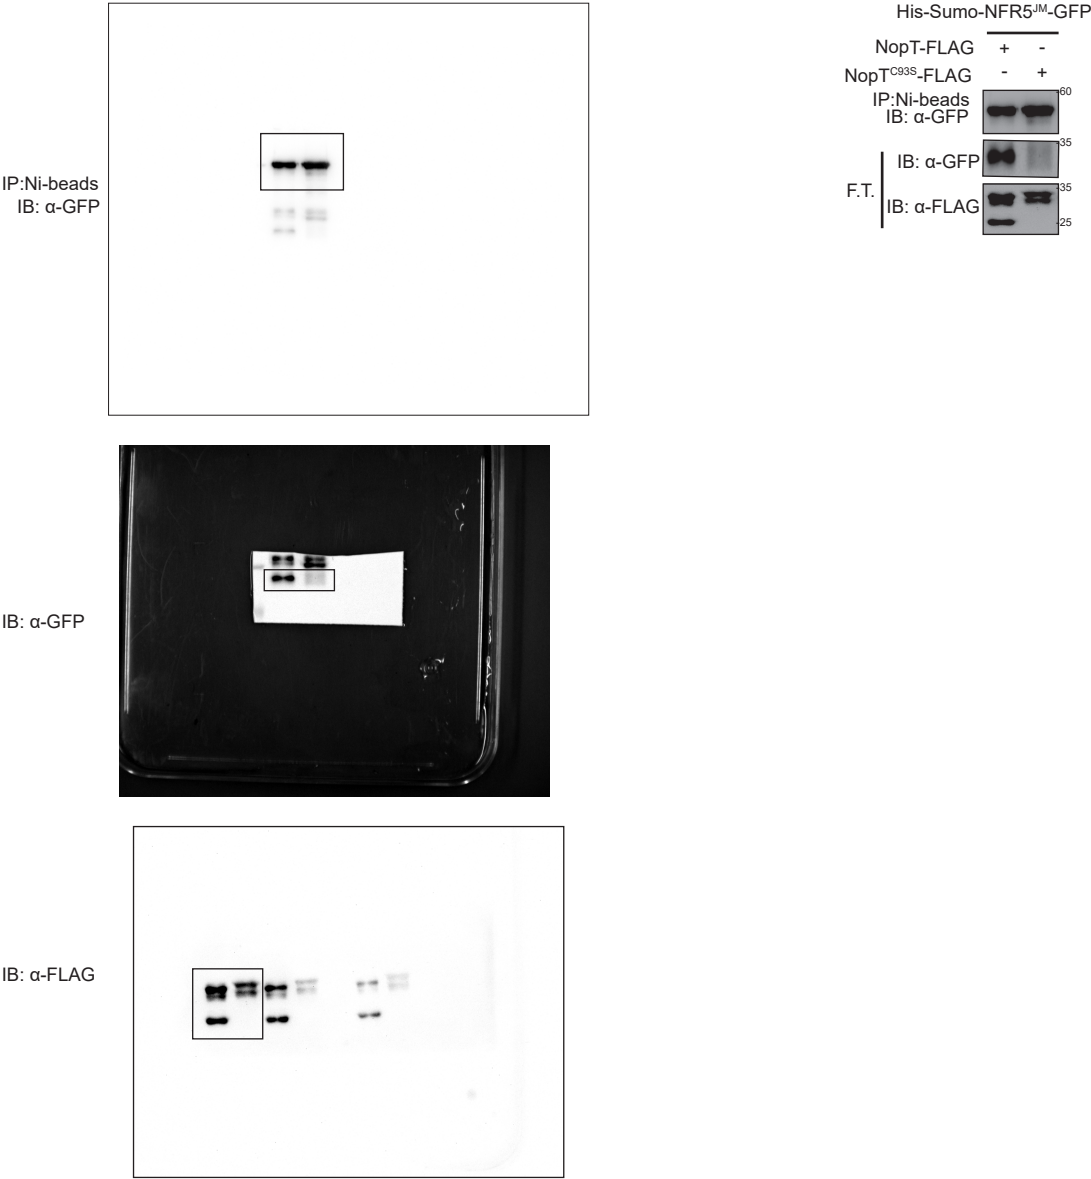

Supplement: fig3-data2 [file elife-97196-fig3-data2-v1.zip]

Fig. 3D

IB:  $\alpha$ -HA

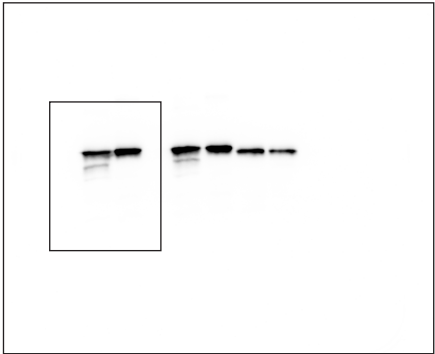

IB:  $\alpha$ -FLAG

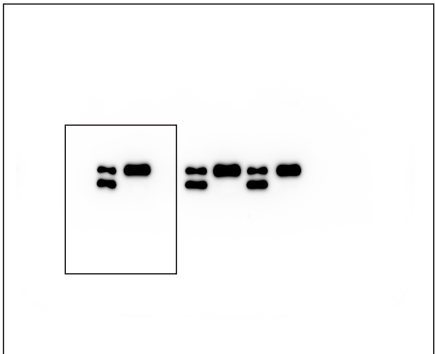

IB:  $\alpha$ -groEL

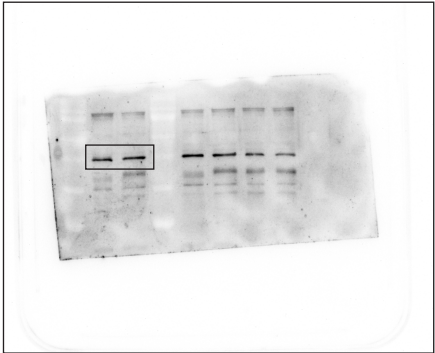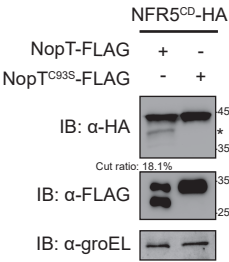

Supplement: fig3-data2 [file elife-97196-fig3-data2-v1.zip]

Figure 3-figure supplement 1B

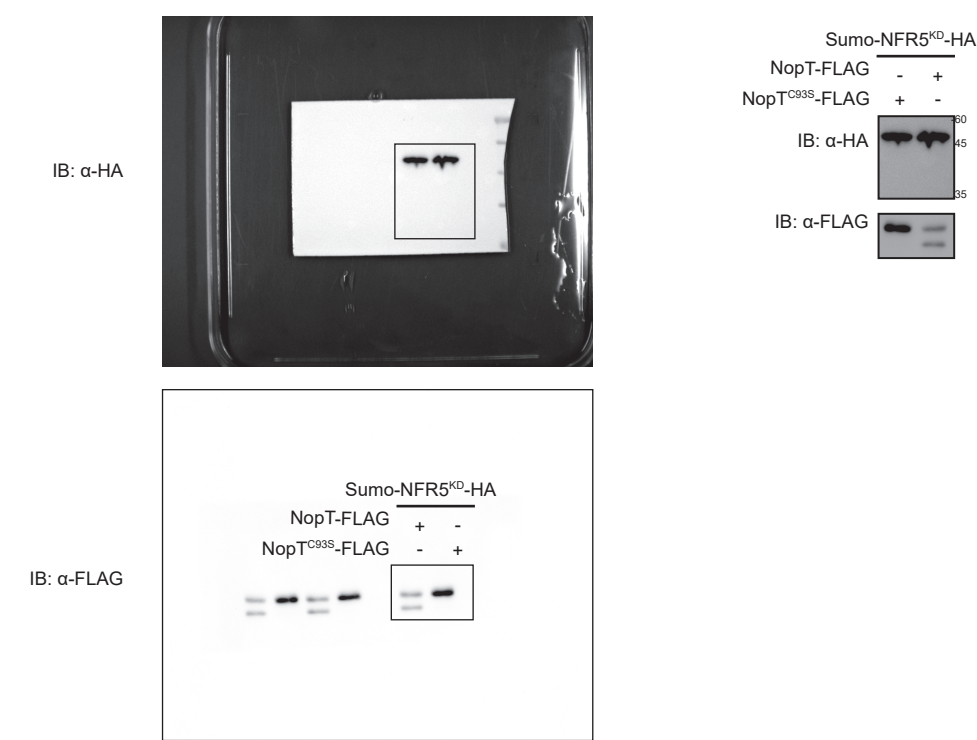

Supplement: fig3-figsupp1-data2 [file elife-97196-fig3-figsupp1-data2-v1.zip]

Figure 3-figure supplement 1A

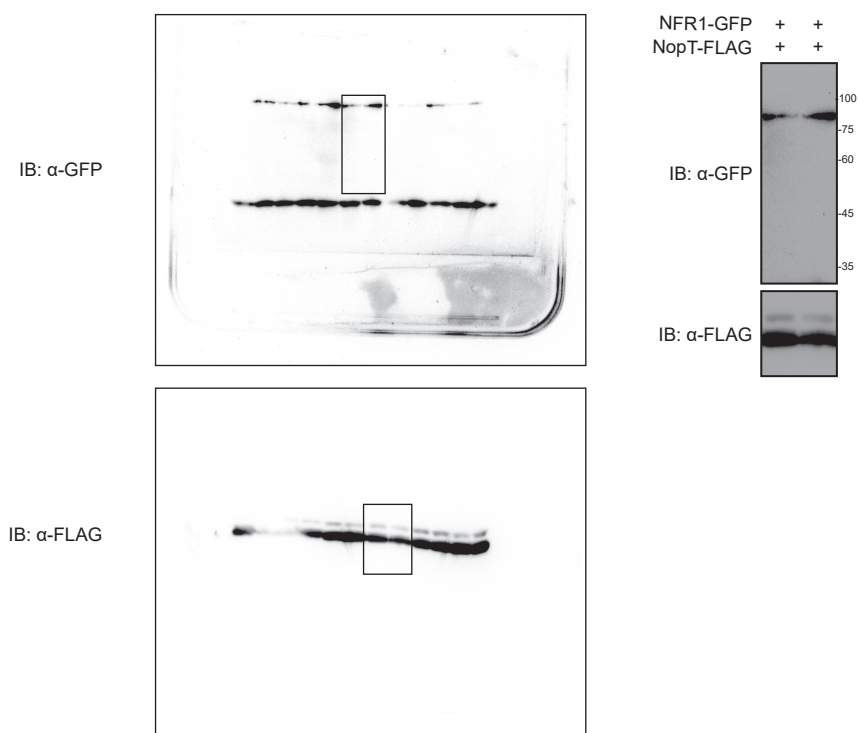

Supplement: fig3-figsupp1-data2 [file elife-97196-fig3-figsupp1-data2-v1.zip]

Figure 3-figure supplement 4C

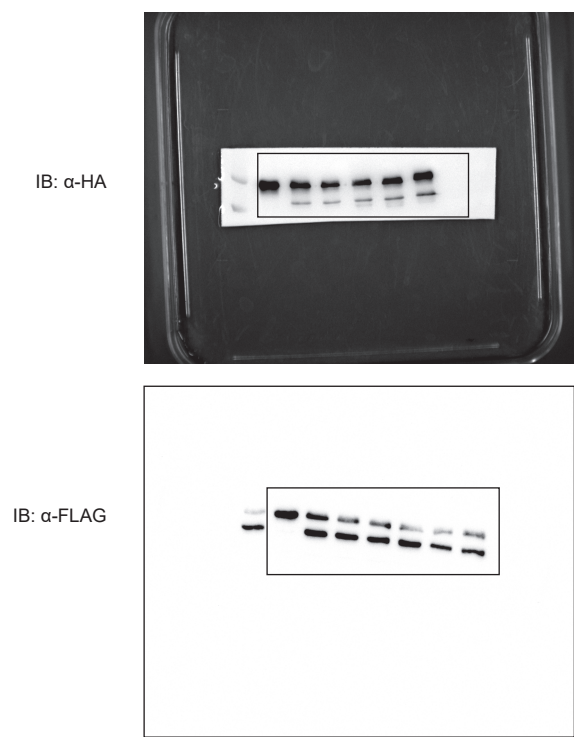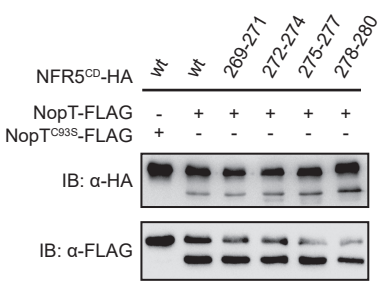

Supplement: fig3-figsupp4-data2 [file elife-97196-fig3-figsupp4-data2-v1.zip]

Figure 3-figure supplement 4F

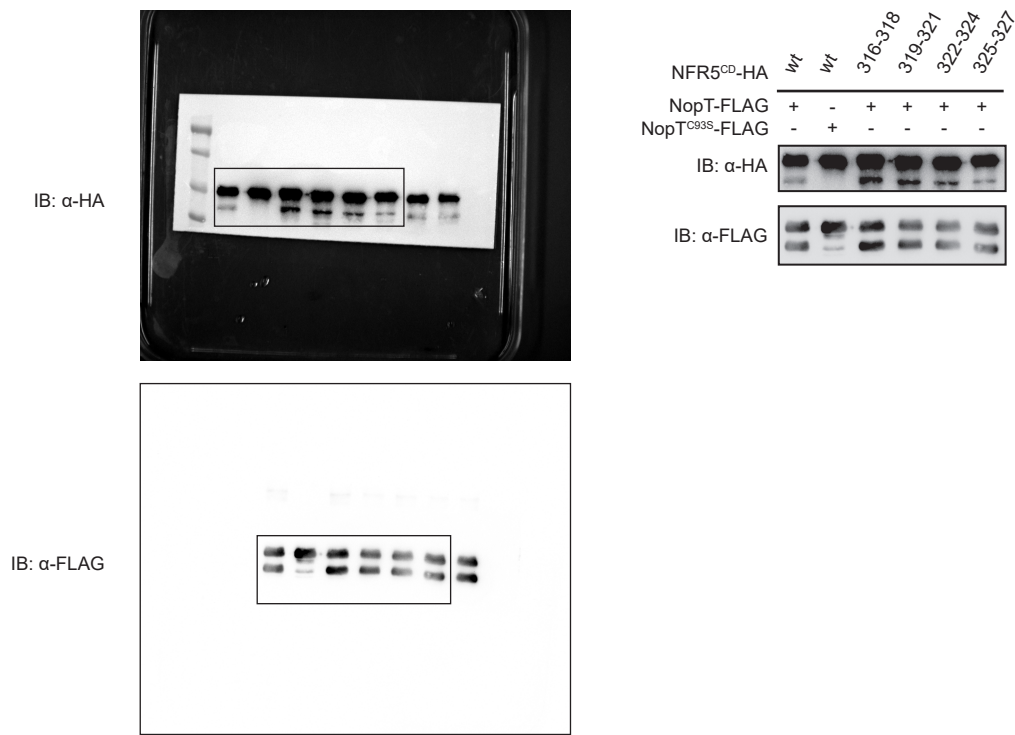

Supplement: fig3-figsupp4-data2 [file elife-97196-fig3-figsupp4-data2-v1.zip]

Figure 3-figure supplement 4B

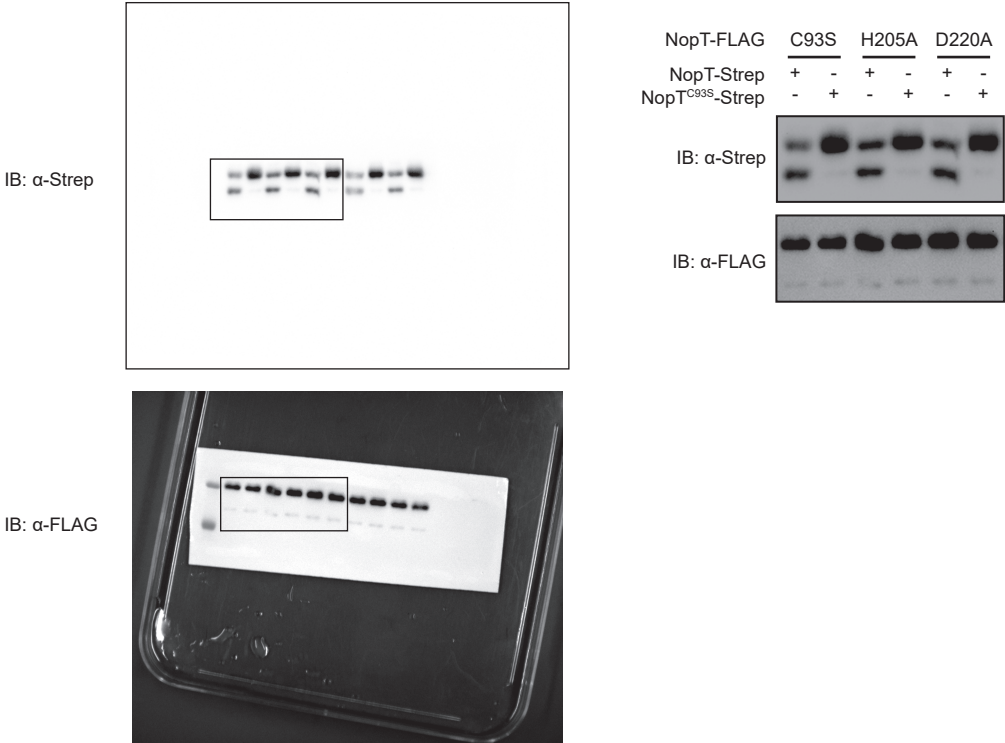

Supplement: fig3-figsupp4-data2 [file elife-97196-fig3-figsupp4-data2-v1.zip]

Figure 3-figure supplement 4A

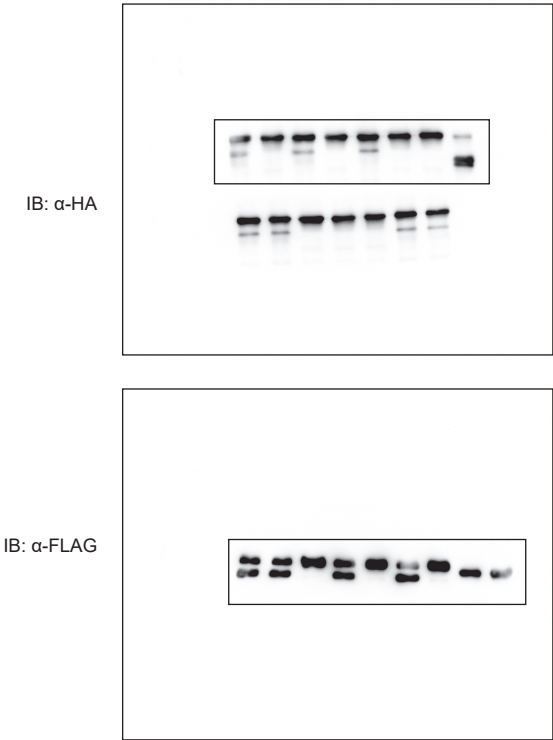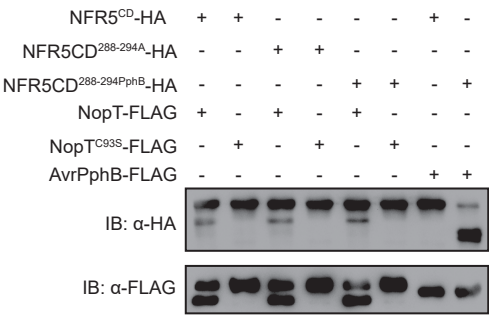

Supplement: fig3-figsupp4-data2 [file elife-97196-fig3-figsupp4-data2-v1.zip]

Figure 3-figure supplement 4G

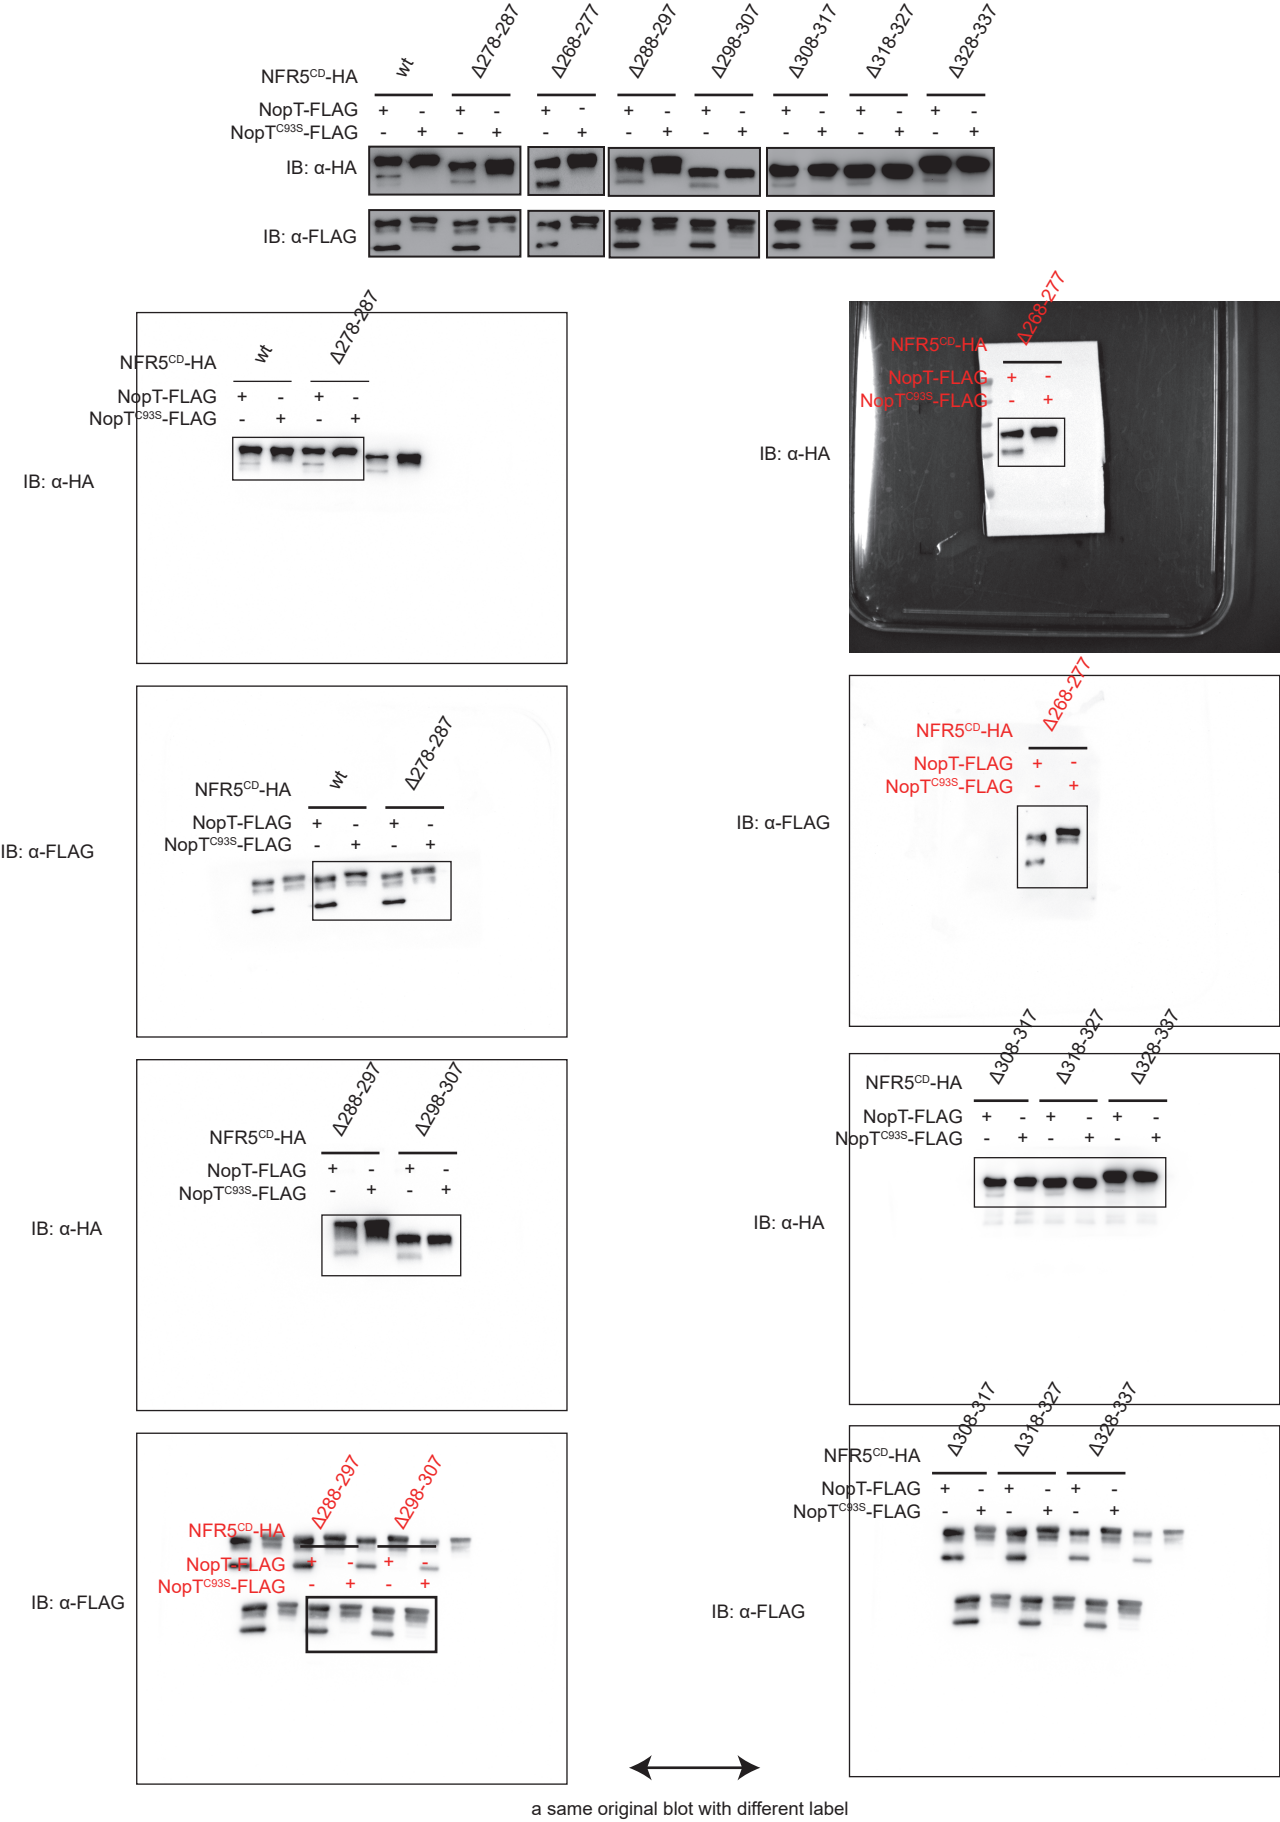

Supplement: fig3-figsupp4-data2 [file elife-97196-fig3-figsupp4-data2-v1.zip]

Figure 3-figure supplement 4E

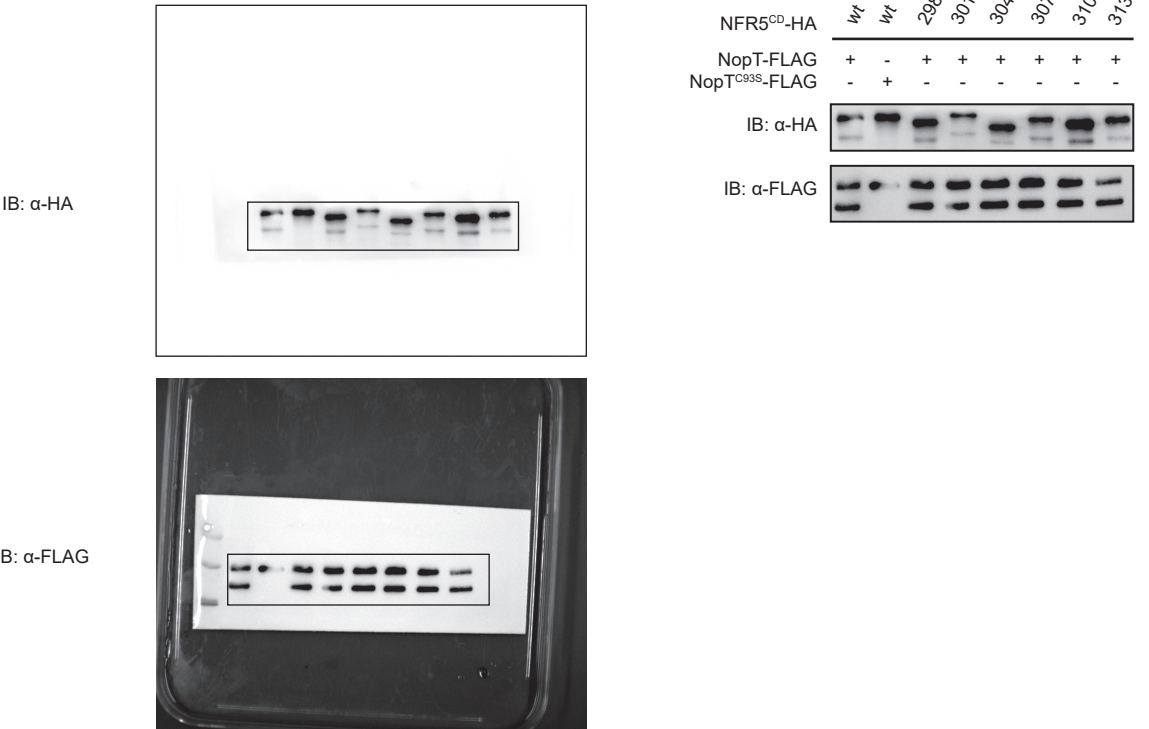

Supplement: fig3-figsupp4-data2 [file elife-97196-fig3-figsupp4-data2-v1.zip]

Figure 3-figure supplement 4D

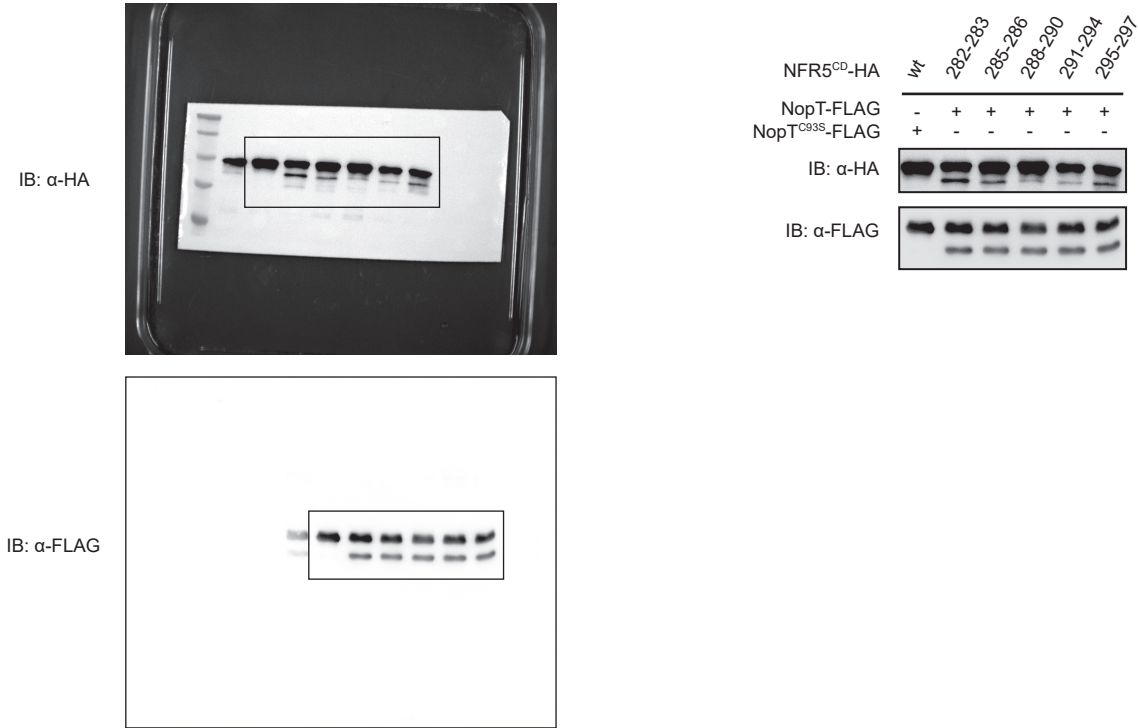

Supplement: fig3-figsupp4-data2 [file elife-97196-fig3-figsupp4-data2-v1.zip]

Fig. 4D

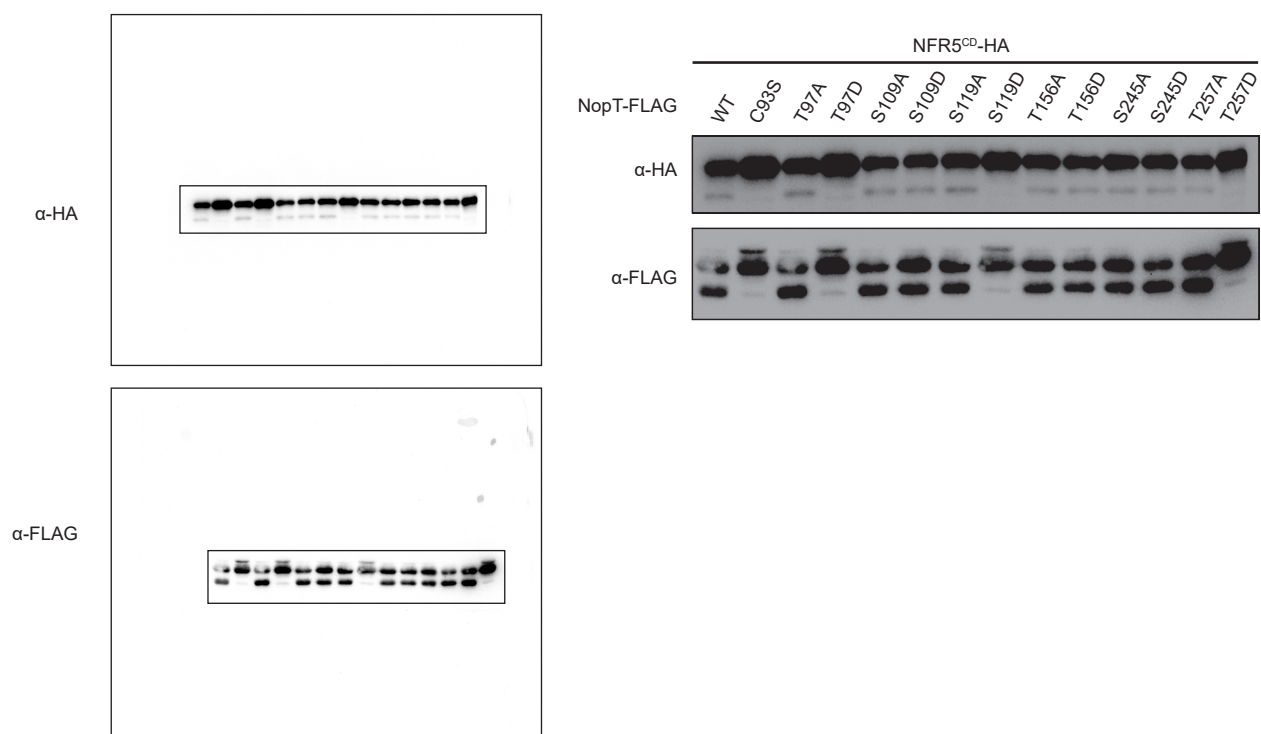

Supplement: fig4-data2 [file elife-97196-fig4-data2-v1.zip]

Fig. 4C

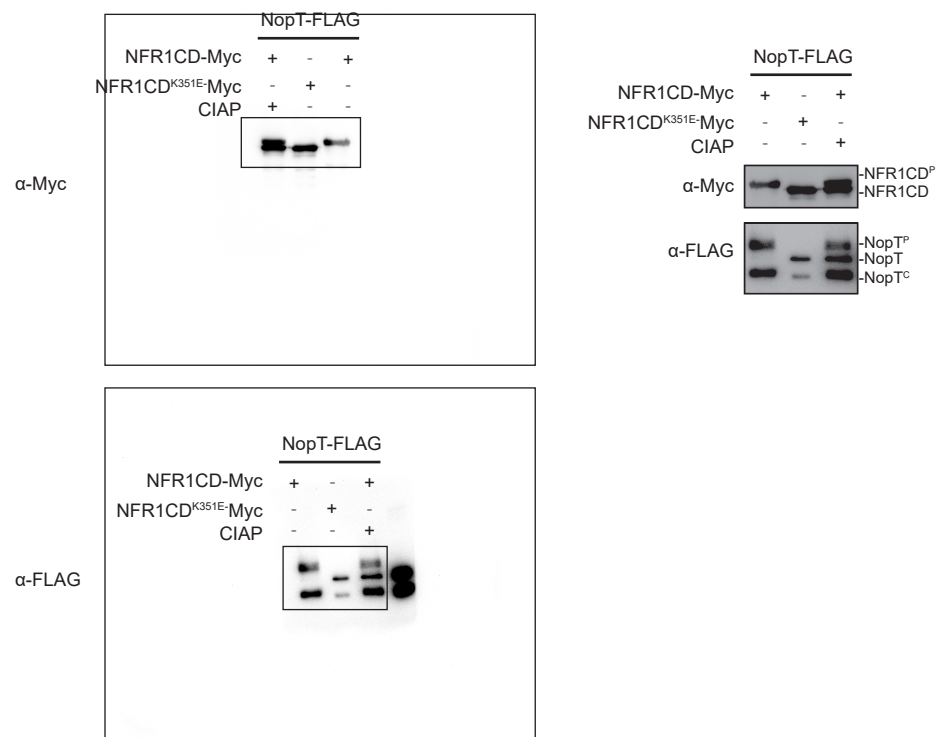

Supplement: fig4-data2 [file elife-97196-fig4-data2-v1.zip]

Fig. 4A

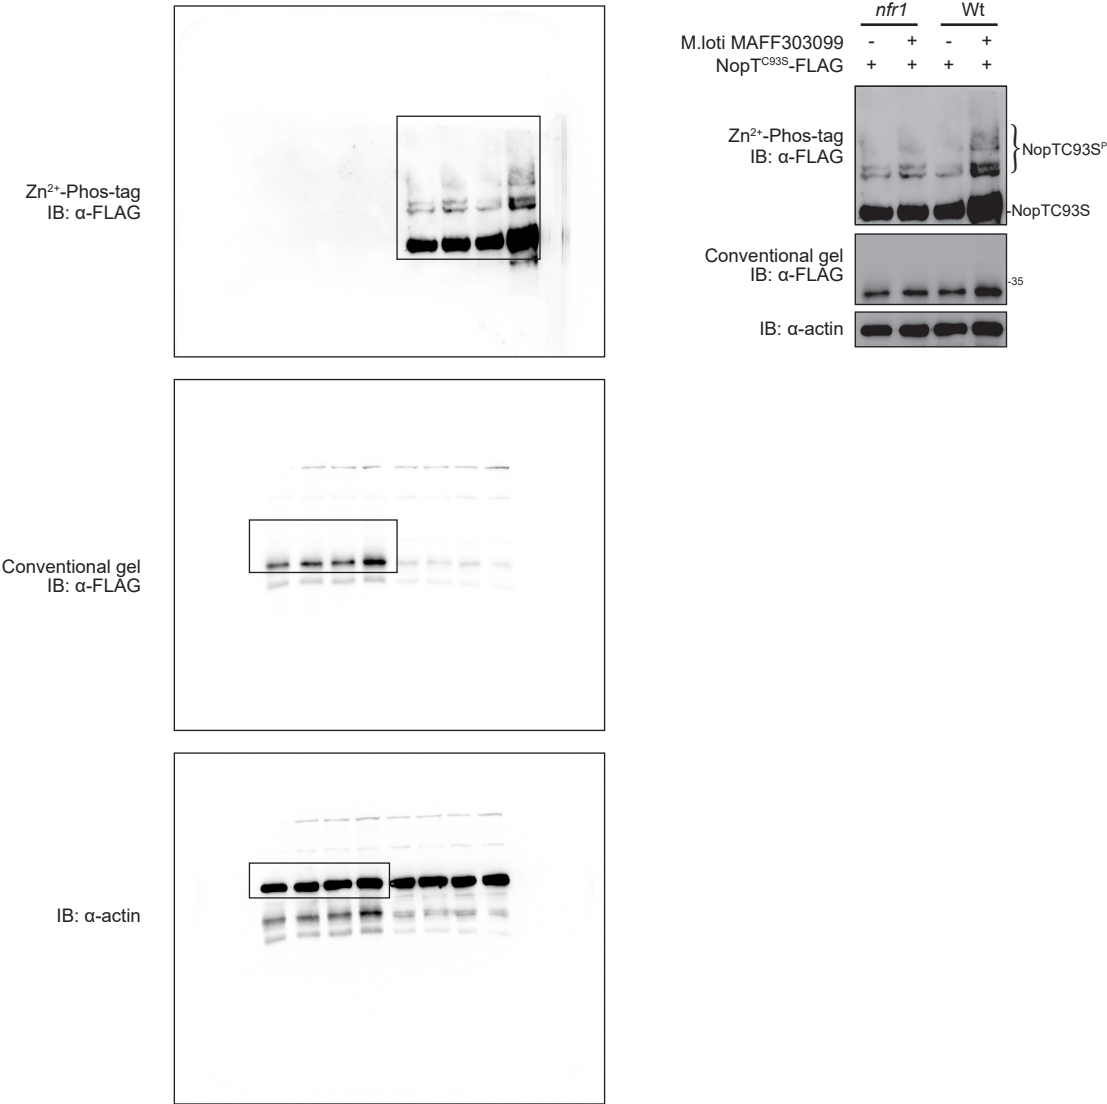

Supplement: fig4-data2 [file elife-97196-fig4-data2-v1.zip]
